# Supplementary material
Source: Copernicus journal article supplement (doi:10.5194/os-22-1793-2026)
Supplement: Supplementary file [file os-22-1793-2026-supplement-title-page.pdf › os-22-1793-2026-supplement-title-page.pdf]

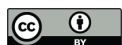

*Supplement of*

## **Gliding through marine heatwaves: subsurface biogeochemical characteristics on the Australian continental shelf**

**Daneeja Mawren et al.**

*Correspondence to:* Daneeja Mawren ([daneejamawren@gmail.com](mailto:daneejamawren@gmail.com))

- `os-22-1793-2026-supplement-title-page.pdf`
- `Copy of Supplementary_gliders_May2026.docx`
- `__MACOSX`
  - `._Copy of Supplementary_gliders_May2026.docx`

The copyright of individual parts of the supplement might differ from the article licence.
